# Supplementary material for: Community and health system intervention to reduce disrespect and abuse during childbirth in Tanga Region, Tanzania: A comparative before-and-after study
Source: PubMed Central journal article supplement (PMC5507413; doi:10.1371/journal.pmed.1002341), 2017-07-11
Supplement: pmed.1002341.s001.pdf [file pmed.1002341.s001.pdf]

|                                                                                            | <b>OR</b> | <b>95% CI</b> |
|--------------------------------------------------------------------------------------------|-----------|---------------|
| Difference in differences estimate (time period*district)                                  | 0.35 ***  | [0.20 - 0.62] |
| <b>Demographics</b>                                                                        |           |               |
| Ages 20-34 (reference group)                                                               |           |               |
| Ages 15-19                                                                                 | 1.21      | [0.85 - 1.72] |
| Ages 35-48                                                                                 | 1.20      | [0.78 - 1.84] |
| Attended secondary education or greater                                                    | 1.34      | [0.99 - 1.81] |
| Married                                                                                    | 0.83      | [0.61 - 1.13] |
| 2-3 births (reference group)                                                               |           |               |
| 1st birth                                                                                  | 1.37      | [1.00 - 1.88] |
| 4 or more births                                                                           | 1.12      | [0.77 - 1.63] |
| Poor                                                                                       | 1.17      | [0.91 - 1.50] |
| Reported low mood or depression in last 12 months                                          | 1.27      | [0.99 - 1.62] |
| Reported ever being physically abused or raped                                             | 2.27 ***  | [1.54 - 3.34] |
| <b>Delivery experience</b>                                                                 |           |               |
| Length of stay for delivery ≤ 1 day                                                        | 1.36 *    | [1.05 - 1.77] |
| Caesarean section                                                                          | 1.00      | [0.56 - 1.78] |
| Reported any complications during childbirth                                               | 2.05 ***  | [1.59 - 2.63] |
| Came directly to the facility for childbirth                                               | 0.72 *    | [0.54 - 0.95] |
| * p ≤ 0.05, ** p ≤ 0.01, *** p ≤ 0.001; all models controlled for district and time period |           |               |
